# Supplementary material for: AhaP, A Quorum Quenching Acylase from Psychrobacter sp. M9-54-1 That Attenuates Pseudomonas aeruginosa and Vibrio coralliilyticus Virulence
Source: PubMed Central journal article supplement (PMC7823738; doi:10.3390/md19010016), 2021-01-01
Supplement: marinedrugs-19-00016-s001.pdf [file marinedrugs-19-00016-s001.pdf]

Supplementary Materials:

## **AhaP, a quorum quenching acylase from *Psychrobacter* sp. M9-54-1 that attenuates *Pseudomonas aeruginosa* and *Vibrio coralliilyticus* virulence**

José Carlos Reina<sup>1</sup>, Manuel Romero<sup>2</sup>, Rafael Salto<sup>3</sup>, Miguel Cámara<sup>2</sup>, Inmaculada Llamas<sup>1,4\*</sup>

<sup>1</sup>Department of Microbiology, Faculty of Pharmacy, University of Granada, Campus Universitario Cartuja s/n, 18071 Granada, Spain.

<sup>2</sup>National Biofilms Innovation Centre, Biodiscovery Institute and School of Life Sciences, University of Nottingham, Nottingham, NG7 2RD, UK.

<sup>3</sup>Department of Biochemistry, Faculty of Pharmacy, University of Granada, Campus Universitario Cartuja s/n, 18071 Granada, Spain.

<sup>4</sup>Institute of Biotechnology, Biomedical Research Center (CIBM), University of Granada, 18100 Granada, Spain.

\*Correspondence: illamas@ugr.es

**Supplementary Table S1.** Quorum quenching enzymes used in this study as queries in the BLASTp search for the identification of the QQ enzyme in *Psychrobacter* sp. M9-54-1.

| Enzyme                           | Accession number | Species                                             | Enzyme type                                     | Reference |
|----------------------------------|------------------|-----------------------------------------------------|-------------------------------------------------|-----------|
| <b>AiiA</b>                      | AAM61772.1       | <i>Bacillus</i> spp.                                | Lactonase (Metallo-beta-lactamases superfamily) | [1]       |
| <b>AaC <i>Shewanella</i> sp.</b> | BAF94155.1       | <i>Shewanella</i> sp. MIB015                        | Acylase (Ntn-hydrolase)                         | [2]       |
| <b>AaC <i>Ralstonia</i> sp.</b>  | AAO41113.1       | <i>Ralstonia solanacearum</i> GMI1000               | Acylase (Ntn-hydrolase)                         | [3]       |
| <b>AhID</b>                      | AAP57766.1       | <i>Arhtobacter</i> sp. IBN110                       | Lactonase (Metallo-beta-lactamases superfamily) | [4]       |
| <b>AhIK</b>                      | AAO47340.1       | <i>Klebsiella pneumoniae</i> KCTC2241               | Lactonase (Metallo-beta-lactamases superfamily) | [4]       |
| <b>AhIM</b>                      | AAT68473.1       | <i>Streptomyces</i> sp. M664                        | Acylase (Ntn-hydrolase)                         | [5]       |
| <b>AhIS</b>                      | BAK54003.1       | <i>Solibacillus silvestris</i> StLB046              | Lactonase (Metallo-beta-lactamases superfamily) | [6]       |
| <b>AidC</b>                      | BAP32158.1       | <i>Chryseobacterium</i> sp. StRB126                 | Lactonase (Metallo-beta-lactamases superfamily) | [7]       |
| <b>AiiM</b>                      | BAJ75775.1       | <i>Microbacterium testaceum</i> StLB037             | Lactonase (Metallo-beta-lactamases superfamily) | [7]       |
| <b>AiiO</b>                      | ADI80348.1       | <i>Ochrobactrum</i> sp. A44                         | Acylase (alfa/beta hydrolase)                   | [8]       |
| <b>AttM</b>                      | AAD43990.1       | <i>Agrobacterium tumefaciens</i> C58, M103          | Lactonase (Metallo-beta-lactamases superfamily) | [9]       |
| <b>Bpib01</b>                    | ABU51804.1       | Metagenome                                          | Hypothetical                                    | [10]      |
| <b>Bpib04</b>                    | ABU51107.1       | Metagenome                                          | Lactonase (Glycosyl hydrolase)                  | [10]      |
| <b>Bpib05</b>                    | ABU51109.1       | Metagenome                                          | Hypothetical                                    | [11]      |
| <b>Bpib07</b>                    | ABU51111.1       | Metagenome                                          | Lactonase (Dienolactone hydrolase)              | [10]      |
| <b>HacA</b>                      | YP_235052.1      | <i>Pseudomonas syringae</i> B728a                   | Acylase (Ntn-hydrolase)                         | [12]      |
| <b>HacB</b>                      | YP237923.1       | <i>Pseudomonas syringae</i> B728a                   | Acylase (Ntn-hydrolase)                         | [12]      |
| <b>MCP</b>                       | AAS06218.1       | <i>M. avium</i> subsp. <i>paratuberculosis</i> K-10 | Phosphotriesterase-like lactonase (PLL)         | [13]      |
| <b>PON</b>                       | EAP_90803.1      | <i>Oceanicaulis alexandrii</i> HTCC2633             | Lactonase (Paraoxonase)                         | [14]      |
| <b>PpH</b>                       | NP_214744.1      | <i>Mycobacterium tuberculosis</i>                   | Phosphotriesterase-like lactonase (PLL)         | [15]      |
| <b>PvdQ</b>                      | NP_251075.1      | <i>Pseudomonas aeruginosa</i> PAO1                  | Acylase (Ntn-hydrolase)                         | [16]      |
| <b>QlcA</b>                      | ABV58973.1       | Sin identificar ( <i>metagenoma</i> )               | Lactonase (Metallo-beta-lactamases superfamily) | [17]      |
| <b>QsdA</b>                      | AAT06802.1       | <i>Rhodococcus erythropolis</i> W2                  | Phosphotriesterase-like lactonase (PLL)         | [15]      |
| <b>QsdB</b>                      | AFX82613.1       | Sin identificar ( <i>metagenoma</i> )               | Acilase (Amidase signature family)              | [18]      |
| <b>QsdH</b>                      | AFV15299.1       | <i>Pseudoalteromonas byunsanensis</i>               | Lactonase (GDSL-hidrolases family)              | [19]      |
| <b>QuiP</b>                      | AAG04421.1       | <i>Pseudomonas aeruginosa</i> PAO1                  | Acylase (Ntn-hydrolase)                         | [20]      |
| <b>Sislac</b>                    | Pdb 4G2D A       | <i>Sulfolobus islandicus</i>                        | No identified                                   | [21]      |
| <b>SsoPox</b>                    | Q97VT7.1         | <i>Sulfolobus solfataricus</i> P2                   | No identified                                   | [22]      |

**Figure S1.** Alignment of the protein sequences of AhaP from *Psychrobacter* sp. M9-54-1 and PvdQ (NP\_251075.1) from *Pseudomonas aeruginosa* PAO1.

```

AhaP M9-54-1      1 MSINVLNRRVRLTLLTMAVSLGTFGCSNDNFNGNIDDTGTDSTYAAADIQRTEFGIPHI
PvdQ PAO1        1 MGM-----R-----TVLTGLAGMLLGS-MMPVQADMPPRTGLAADI RWTAYGVPHI

AhaP M9-54-1     61 TARNYKGLGYGVGYAFEDNICSLAREIIVAKGESMRVYLGAEENE-----NSDVFYTW
PvdQ PAO1        46 RAKDERGLGYGLGYAVARDNACLLEIEIVTARGERARYFGSEGKSSAELDNLPSDIFYAW

AhaP M9-54-1     114 YNSPERRSGFLGAODPEVIDAVKGYAAGVNRVYLDHDKGVKNIEDPACAGAEWVREINIDDM
PvdQ PAO1        106 LNQPEALQAEFWQAQTPAVRQLLEGYAAGFNRFLREADG---KTTSGLGQPWLRATATDDL

AhaP M9-54-1     174 LADYGKANLRGGLSNFVKQIAQVAPPASGIVMGSSRMS SPEPIAESDEKFDMTTINVLDG
PvdQ PAO1        163 LRTTRRLLVGGVGGVADALVAAAPPGAEKVALSGEQA----FQVAE---QRRQRFRLER

AhaP M9-54-1     234 GSNAYAFVSGSKVTGTDSCVMYGNPHEPWEVQRFYEFHTTIPGKLDVMGSAQQGQPFINIG
PvdQ PAO1        216 GSNAIIVVSGERSADGKMLLANPHFPWNGAMRFYQMHLLTIPGRLDVMGASLPLPVPVNI

AhaP M9-54-1     294 FNKDVAVSHVSTAKRFTLYQLSLVNGSPFKVNYVNSDGKVEQRDIETVPVIVK--MPNN
PvdQ PAO1        276 FSRHLAWHTVDTSSHTLYRLALDPKDPRLVLDGRSLPLEEKS---VAIEVVRGADGKL

AhaP M9-54-1     352 QTITRNIVVSHYGPILNAKLLDPRLPWAGDANVVVYTIIRDAASENPRALNQWRSMNMATS
PvdQ PAO1        333 SRVEHKVYQSIYGPLVV---WPGKLDWNR--SEAYALRDANLENTRVLQQWYSINQASD

AhaP M9-54-1     412 VGDIVDRMOKILGLGFVNTIATDRNCKALYADISTVFNVTREKLVACSDAGAAALPLLIA
PvdQ PAO1        387 VADLRRRVEALQGIPTWNTLAADEQGNALYMNQSVVYLPKPELIPAC-----AIPQLVA

AhaP M9-54-1     472 ADLPAINGSTAACEWDTADADSPAGIFGGSKLFFLIRDDYVVLNSNDSYWLSNAEQPLTGF
PvdQ PAO1        441 EGLPALQGDQSRCAWSDPAAAQAGITPAAQLPVLRLRDFVQNSNDSAWLTPASPLOGF

AhaP M9-54-1     532 SPLRRDLPLISEDAAPLSLRTRMFTQVLDLNLNKDGLGHNFDLQVYVYGNRSYA
PvdQ PAO1        501 SPLVVSQEK-----PIGPRARVALSR---LQ----GKQPLEAKTLEEMVTANHVFS

AhaP M9-54-1     592 AELVLDVLEADCNANPMLPLTGGATIEAKQACSILNNWDRRNIDSRGAHVFRFVWNAAG
PvdQ PAO1        544 ADQVLPDLRLCRDNQG-----EKSLARACAALAQWDRGANLDSGSGFVYFQRFMQ-R

AhaP M9-54-1     652 FSEYTNDSFKVVFNEADPINTPRELKI-----TAQTRQALGDATAYFQNKGTALDASLGE
PvdQ PAO1        596 F-AELDGAVKPEPFDAQRELDTPQGIALDRPQVATQVRQALADAAAEVEKSGIPD GARWGD

AhaP M9-54-1     707 LQYVLDAGKNNQHIPMHGGYSGEIGFNVARCAGVNEAGNYIINNCPYMQSVTFDSKGPV
PvdQ PAO1        655 LQVST---RQERIAIAPGGDGHFCVYNAIQS--VRKGDHLEVVGCTSYIQLVTFPEEGEK

AhaP M9-54-1     767 VEALLAYSQAGDTRRPFYHRDQTRRYSDDKKWIRLPFSKSETISKQAVGEVIKLR
PvdQ PAO1        710 ARGLLAFSSDPRSPHYRDQTELESRQQWQTLPFSDRQIDADPQLQRLSIRE

```

## References

- Dong, Y.H.; Xu, J.L.; Li, X.Z.; Zhang, L.H. AiiA, an enzyme that inactivates the acylhomoserine lactone quorum-sensing signal and attenuates the virulence of *Erwinia carotovora*. *Proc. Natl. Acad. Sci. U. S. A.* **2000**, *97*, 3526–31, doi:10.1073/pnas.060023897.
- Morohoshi, T.; Nakazawa, S.; Ebata, A.; Kato, N.; Ikeda, T. Identification and Characterization of N -Acylhomoserine Lactone-Acylase from the Fish Intestinal *Shewanella* sp. Strain MIB015. *Biosci. Biotechnol. Biochem.* **2008**, *72*, 1887–1893, doi:10.1271/bbb.80139.
- Chen, C.-N.; Chen, C.-J.; Liao, C.-T.; Lee, C.-Y. A probable aculeacin A acylase from the *Ralstonia solanacearum* GMI1000 is N-acyl-homoserine lactone acylase with quorum-quenching activity. *BMC Microbiol.* **2009**, *9*, 89, doi:10.1186/1471-2180-9-89.
- Park, S.Y.; Lee, S.J.; Oh, T.K.; Oh, J.W.; Koo, B.T.; Yum, D.Y.; Lee, J.K. AhlD, an N-acylhomoserine lactonase in *Arthrobacter* sp., and predicted homologues in other bacteria. *Microbiology* **2003**, *149*, 1541–1550, doi:10.1099/mic.0.26269-0.
- Park, S.; Kang, H.; Jang, H.; Koo, B.; Yum, D.; Park, S.; Kang, H.; Jang, H.; Lee, J.; Koo, B. Identification of Extracellular N -Acylhomoserine Lactone Acylase from a *Streptomyces* sp. and Its Application to Quorum Quenching. *Appl. Environ. Microbiol.* **2005**, *71*, 2632–2641, doi:10.1128/AEM.71.5.2632.
- Morohoshi, T.; Tominaga, Y.; Someya, N.; Ikeda, T. Complete genome sequence and characterization of the N-acylhomoserine lactone-degrading gene of the potato leaf-associated *Solibacillus silvestris*. *J. Biosci. Bioeng.* **2012**, *113*, 20–25, doi:10.1016/j.jbiosc.2011.09.006.

7. Wang, W.Z.; Morohoshi, T.; Someya, N.; Ikeda, T. Aidc, a Novel N-Acylhomoserine Lactonase from the Potato Root-Associated *Cytophaga-Flavobacteria-Bacteroides* (CFB) Group Bacterium *Chryseobacterium* sp. Strain strb126. *Appl. Environ. Microbiol.* **2012**, *78*, 7985–7992, doi:10.1128/AEM.02188-12.
8. Czajkowski, R.; Krzyzanowska, D.; Karczewska, J.; Atkinson, S.; Przysowa, J.; Lojkowska, E.; Williams, P.; Jafra, S. Inactivation of AHLs by *Ochrobactrum* sp. A44 depends on the activity of a novel class of AHL acylase. *Environ. Microbiol. Rep.* **2011**, *3*, 59–68, doi:10.1111/j.1758-2229.2010.00188.x.
9. Zhang, H.-B.; Wang, L.-H.; Zhang, L.-H. Genetic control of quorum-sensing signal turnover in *Agrobacterium tumefaciens*. *Proc. Natl. Acad. Sci. U. S. A.* **2002**, *99*, 4638–43, doi:10.1073/pnas.022056699.
10. Schipper, C.; Hornung, C.; Bijtenhoorn, P.; Quitschau, M.; Grond, S.; Streit, W.-R. Metagenome-derived clones encoding two novel lactonase family proteins involved in biofilm inhibition in *Pseudomonas aeruginosa*. *Appl. Environ. Microbiol.* **2009**, *75*, 224–233, doi:10.1128/AEM.01389-08.
11. Bijtenhoorn, P.; Schipper, C.; Hornung, C.; Quitschau, M.; Grond, S.; Weiland, N.; Streit, W.R. BpiB05, a novel metagenome-derived hydrolase acting on N-acylhomoserine lactones. *J. Biotechnol.* **2011**, *155*, 86–94, doi:10.1016/j.jbiotec.2010.12.016.
12. Shepherd, R.W.; Lindow, S.E. Two dissimilar N-acyl-homoserine lactone acylases of *Pseudomonas syringae* influence colony and biofilm Morphology. *Appl. Environ. Microbiol.* **2009**, *75*, 45–53, doi:10.1128/AEM.01723-08.
13. Jeng, Y.C.; Wu, L.; Wen, S.Y. Directed evolution of a quorum-quenching lactonase from *Mycobacterium avium* subsp. paratuberculosis K-10 in the amidohydrolase superfamily. *Biochemistry* **2009**, *48*, 4344–4353, doi:10.1021/bi9004045.
14. Bar-Rogovsky, H.; Huguenmatter, A.; Tawfik, D.S. The evolutionary origins of detoxifying enzymes: The mammalian serum paraoxonases (PONs) relate to bacterial homoserine lactonases. *J. Biol. Chem.* **2013**, *288*, 23914–23927, doi:10.1074/jbc.M112.427922.
15. Afriat, L.; Roodveldt, C.; Manco, G.; Tawfik, D.S. The latent promiscuity of newly identified microbial lactonases is linked to a recently diverged phosphotriesterase. *Biochemistry* **2006**, *45*, 13677–13686, doi:10.1021/bi061268r.
16. Huang, J.J.; Han, J.; Zhang, L.; Leadbetter, J.R. Utilization of Acyl-Homoserine Lactone Quorum Signals for Growth by a Soil Pseudomonad and *Pseudomonas aeruginosa* PAO1. *Appl. Environ. Microbiol.* **2003**, *69*, 5941–5949, doi:10.1128/AEM.69.10.5941.
17. Riaz, K.; Elmerich, C.; Moreira, D.; Raffoux, A.; Dessaux, Y.; Faure, D. A metagenomic analysis of soil bacteria extends the diversity of quorum-quenching lactonases. *Environ. Microbiol.* **2008**, *10*, 560–570, doi:10.1111/j.1462-2920.2007.01475.x.
18. Tannières, M.; Beury-Cirou, A.; Vigouroux, A.; Mondy, S.; Pellissier, F.; Dessaux, Y.; Faure, D. A Metagenomic Study Highlights Phylogenetic Proximity of Quorum-Quenching and Xenobiotic-Degrading Amidases of the AS-Family. *PLoS One* **2013**, *8*, doi:10.1371/journal.pone.0065473.
19. Huang, W.; Lin, Y.; Yi, S.; Liu, P.; Shen, J.; Shao, Z.; Liu, Z. QsdH, a Novel AHL Lactonase in the RND-Type Inner Membrane of Marine *Pseudoalteromonas byunsanensis* Strain 1A01261. *PLoS One* **2012**, *7*, 1–12, doi:10.1371/journal.pone.0046587.
20. Huang, J.J.; Petersen, A.; Whiteley, M.; Leadbetter, J.R. Identification of QuiP, the product of gene PA1032, as the second acyl-homoserine lactone acylase of *Pseudomonas aeruginosa* PAO1. *Appl. Environ. Microbiol.* **2006**, *72*, 1190–1197, doi:10.1128/AEM.72.2.1190-1197.2006.
21. Hiblot, J.; Gotthard, G.; Chabriere, E.; Elias, M. Structural and Enzymatic characterization of the lactonase SisLac from *Sulfolobus islandicus*. *PLoS One* **2012**, *7*, doi:10.1371/journal.pone.0047028.
22. Hiblot, J.; Gotthard, G.; Elias, M.; Chabriere, E. Differential Active Site Loop Conformations Mediate Promiscuous Activities in the Lactonase SsoPox. *PLoS One* **2013**, *8*, 1–14, doi:10.1371/journal.pone.0075272.
